# Supplementary material for: Verapamil extends lifespan in Caenorhabditis elegans by inhibiting calcineurin activity and promoting autophagy
Source: publisher site journal article supplement (doi:10.18632/aging.102951), 2020-03-24
Supplement: Supplementary file [file aging-v12i6-102951-supplementary-material-SD2.pdf]

## SUPPLEMENTARY FIGURES

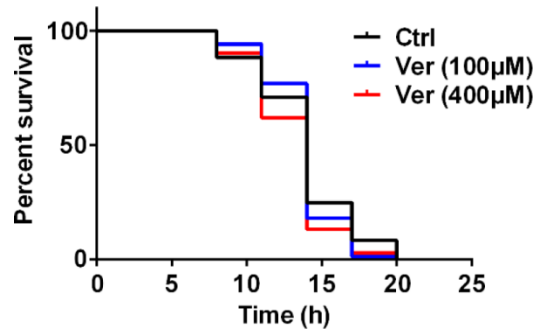

**Supplementary Figure 1. Verapamil does not increase heat stress tolerance in *C. elegans*.** Verapamil (100 µM, 400 µM) did not improve heat stress tolerance in *C. elegans*. The log-rank (Mantel-Cox) test was used to calculate the *P*-values.

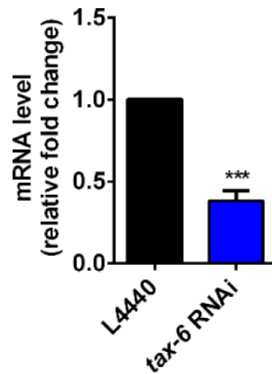

**Supplementary Figure 2. *tax-6* gene mRNA level after *tax-6* RNAi treatment.** The mRNA level of *tax-6* decreased after RNAi treatment (\*\*\*  $P < 0.001$ ). An unpaired t-test was used to evaluate the *P*-values and error bars represent SEM.

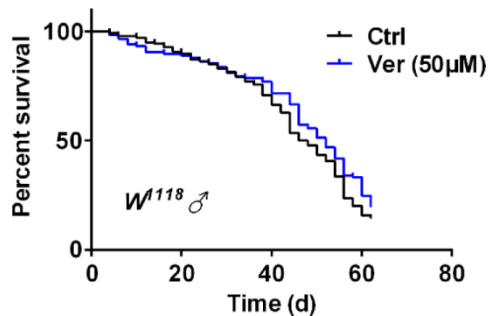

**Supplementary Figure 3. Verapamil extends the lifespan of male *D. melanogaster*.** Verapamil (50 µM) extends the lifespan of male *D. melanogaster*, but not significantly, possibly because the dose of verapamil used was too high for male *D. melanogaster* that could have led to some toxicity. The log-rank (Mantel-Cox) test was used to calculate the *P*-values.

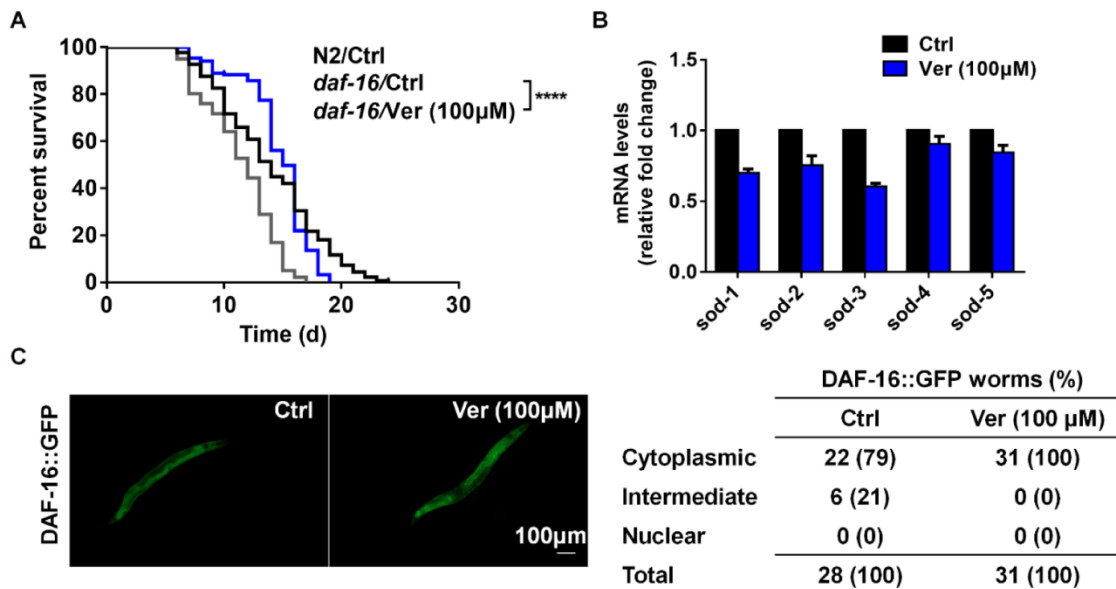

**Supplementary Figure 4. Verapamil-mediated lifespan extension is DAF-16-independent.** (A) Verapamil (100 µM) extended *daf-16* mutant lifespan (\*\*\*\* $P < 0.0001$ ). The log-rank (Mantel-Cox) test was used to calculate  $P$ -values. (B) Verapamil (100 µM) did not increase the expression of *sod* family. Multiple  $t$ -tests were used to assess the  $P$ -values and error bars represent SEM. (C) Verapamil (100 µM) treatment did not lead to nuclear translocation of DAF-16::GFP.

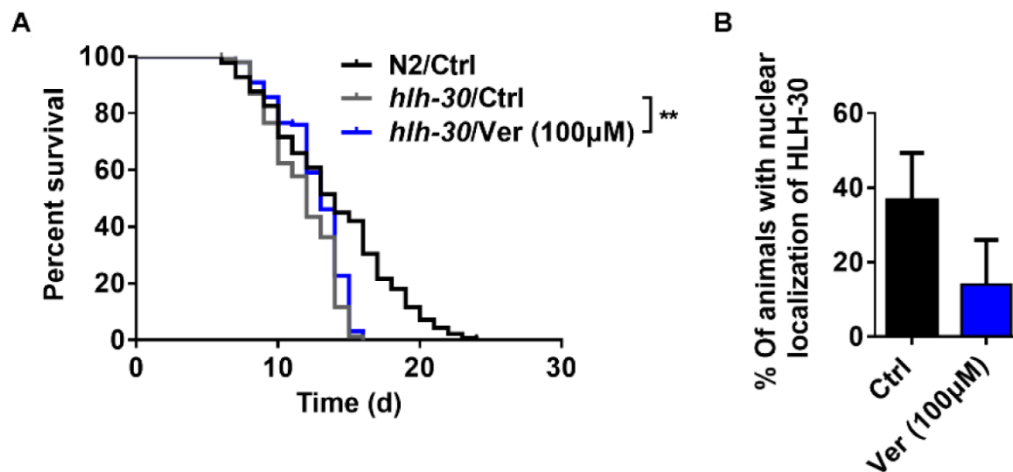

**Supplementary Figure 5. Verapamil-mediated lifespan extension is HLH-30-independent.** (A) Verapamil (100 µM) still extends the lifespan of *hlh-30* mutant (\*\* $P < 0.01$ ). The log-rank (Mantel-Cox) test was used to calculate  $P$ -values. (B) Verapamil (100 µM) treatment did not lead to nuclear translocation of HLH-30::GFP. An unpaired  $t$ -test was used to calculate the  $P$ -values and error bars represent SEM.
