# Supplementary material for: Verapamil extends lifespan in Caenorhabditis elegans by inhibiting calcineurin activity and promoting autophagy
Source: Aging (Albany NY). 2020 Mar 24;12(6):5300–17. doi: 10.18632/aging.102951 (PMC7138547; doi:10.18632/aging.102951)
Supplement: Supplementary Materials and Methods [file aging-12-102951-s002..pdf]

## SUPPLEMENTARY MATERIALS AND METHODS

### Heat stress resistance assay

The heat stress resistance assay was performed as described previously [1]. Approximately 150 animals administrated with control or verapamil (100  $\mu$ M and 400  $\mu$ M) for 6 days were incubated at 35 °C for 24 hours. The number of surviving animals was counted every 3 hours after 8 hours. Experiments were repeated thrice. The log-rank (Mantel-Cox) test was used to assess curve significance.

### *D. melanogaster* lifespan assay

*D. melanogaster* lifespan assays were performed as described [2], and the strain *W<sup>1118</sup>* was used. Synchronized flies were collected under mild CO<sub>2</sub> anaesthesia and distinguished female or male. Then males were transferred to diets of control and verapamil (50  $\mu$ M)-treated groups. The number of flies was counted every other day. Flies were transferred to fresh diets every other day. GraphPad Prism 6 was used to construct the survival curve and the log-rank (Mantel-Cox) test was used to assess curve significance.

### CRISPR/Cas9 technology for generation of *hlh-30* mutation

Two sgRNAs targeting the coding sequence of *hlh-30* were designed by the Guide Design Tool (<http://crispr.mit.edu>). Synthesized sgRNA fragments were inserted into the pDD162 vector (Addgene #47549). The resultant Cas9-sgRNA plasmids (50 ng/ $\mu$ L) were co-injected along with selection markers pCFJ90 *Pmyo-2::mCherry* (1 ng/ $\mu$ L) and pRF4 *rol-6* (su1006) (50 ng/ $\mu$ L) into N2 cells. The F1 progeny were examined by PCR and sequencing for indel mutations. The *hlh-30(hq293)* worms harbor one-nucleotide deletion within the exon, which leads to premature stop codons within the coding sequence of the BHLH domain in all the transcripts of *hlh-30*. sgRNAs for *hlh-30* mutation: TGTTTCAGGTCGTCTCAAGTT; TCAA TGTCGATCGAACTCGT; Sequence variation of *hlh-30*; >WT: agcagtatgataaaaatgaccatgtgccttgaaaattgatacaataagtgttatatcgaaacgaaggaacgaacaaaaaaaccggtttctcatcagatcctcctcctactttccgtcgattttgcgcaaaaattgtctctctaatttctcaagttatgccccaaaatgttcagGTCGTCTCAAGTTCGGCGCGACAGGATTCGATCGACATTGAGAAGATGATTGGCGCCGTGTCTGAACGGCGGTGGGAATAGTGGCGGTGATAATGATCCGGAGGACTATTACCGCGACCGCAGGAAGAAGGACATTACCAATATGAgtgagtgttcgaggtttcaaatTTTTTaaatgaatttcgattcatttttcagTTGAACGCCGACGAAGATATA...

>hq293: agcagtatgataaaaatgaccatgtgccttgaaaattgatacaataagtgttatatcgaaacgaaggaacgaacaaaaaaaccggtttctcatcagatcctcctcctactttccgtcgattttgcgcaaaaattgtctctctaatttctcaagttatgccccaaaatgttcagGTCGTCTCAAGTTCGGCGCGAC-AGTTCGATCGACATTGAGAAGATGATTGGCGCCGTGTCTGAACGGCGGTGGGAATAGTGGCGGTGATAATGATCCGGAGGACTATTACCGCGACCGCAGGAAGAAGGACATTACCAATATGAgtgagtgttcgaggtttcaaatTTTTTaaatgaatttcgattcatttttcagTTGAACGCCGACGAAGATATA...: a frameshift mutation that leads to multiple early stop codons.

### DAF-16::GFP translocation assay

DAF-16::GFP translocation into nuclei was visualized using Nikon Eclipse Ts2R inverted microscope at 100 $\times$  magnification. DAF-16 localization was classified into cytosolic, intermediate, and nuclear localization [3]. The number of animals with each level of translocation was counted after administration of control or verapamil (100  $\mu$ M) for 6 days. Experiments were conducted twice.

### HLH-30::GFP translocation assay

HLH-30::GFP localization into nuclei was visualized using Nikon Eclipse Ts2R inverted microscope at 100 $\times$  magnification. Over 30 animals per group were imaged after 6 days of control and verapamil (100  $\mu$ M) treatment. Experiments were repeated thrice. An unpaired t-test was used to calculate the *P*-values.

## REFERENCES

1. Chen D, Thomas EL, Kapahi P. HIF-1 modulates dietary restriction-mediated lifespan extension via IRE-1 in *Caenorhabditis elegans*. *PLoS Genet.* 2009; 5:e1000486. <https://doi.org/10.1371/journal.pgen.1000486> PMID:19461873
2. Slack C, Foley A, Partridge L. Activation of AMPK by the putative dietary restriction mimetic metformin is insufficient to extend lifespan in *Drosophila*. *PLoS One.* 2012; 7:e47699. <https://doi.org/10.1371/journal.pone.0047699> PMID:23077661
3. Schafer JC, Winkelbauer ME, Williams CL, Haycraft CJ, Desmond RA, Yoder BK. IFTA-2 is a conserved cilia protein involved in pathways regulating longevity and dauer formation in *Caenorhabditis elegans*. *J Cell Sci.* 2006; 119:4088–100. <https://doi.org/10.1242/jcs.03187> PMID:16968739
